# Supplementary material
Source: PubMed Central journal article supplement (PMC5962425)
Supplement: NIHMS958576-supplement.pdf [file NIHMS958576-supplement.pdf]

**Appendix**  
**Physical Activity, Sedentary Behavior, and Retirement: The Multi-Ethnic Study of Atherosclerosis**  
**Jones et al.**

**Appendix Table 1.** Classification of Retirement Status by Reported Employment Category in Main and Four Sensitivity Analyses

| MESA employment category                                              | Main analyses                                                    |                                                                                                                                      | Separate sensitivity analyses |                                                                          |                                                                  |
|-----------------------------------------------------------------------|------------------------------------------------------------------|--------------------------------------------------------------------------------------------------------------------------------------|-------------------------------|--------------------------------------------------------------------------|------------------------------------------------------------------|
|                                                                       |                                                                  | Two-tiered                                                                                                                           | Fully time varying            | Strict                                                                   | Exclude non-workers                                              |
| 1. Employed (or self-employed) full-time                              | Not retired                                                      | Not retired                                                                                                                          | Not retired                   | Not retired                                                              | Not retired                                                      |
| 2. Employed (or self-employed) part-time                              | Not retired                                                      | Not retired                                                                                                                          | Not retired                   | Not retired                                                              | Not retired                                                      |
| 3. Employed, but on leave for health reasons                          | Not retired                                                      | Not retired                                                                                                                          | Not retired                   | Not retired                                                              | Not retired                                                      |
| 4. Employed but temporarily away from job (other than health reasons) | Not retired                                                      | Not retired                                                                                                                          | Not retired                   | Not retired                                                              | Not retired                                                      |
| 5. Unemployed or laid off, <6 months                                  | Not retired                                                      | Not retired                                                                                                                          | Not retired                   | Not retired                                                              | Excluded                                                         |
| 6. Unemployed or laid off, ≥6 months                                  | Not retired                                                      | Not retired                                                                                                                          | Not retired                   | Not retired                                                              | Excluded                                                         |
| 7. Homemaker, not working outside home                                | Not retired                                                      | Not retired                                                                                                                          | Not retired                   | Not retired                                                              | Excluded                                                         |
| 8. Retired from usual occupation and not working                      | Retired                                                          | Retired and not working                                                                                                              | Retired                       | Retired if reported 0 working hours and 0 occupational physical activity | Retired                                                          |
| 9. Retired from usual occupation and volunteering                     | Retired                                                          | Retired and not working                                                                                                              | Retired                       | Retired if reported 0 working hours and 0 occupational physical activity | Retired                                                          |
| 10. Retired from usual occupation and working for pay                 | Retired                                                          | Retired and working                                                                                                                  | Retired                       | Retired if reported 0 working hours and 0 occupational physical activity | Retired                                                          |
| Variation of retirement status over time                              | Retired for all visits after first meeting retirement definition | Retired only at visits meeting retirement definition; participants may be reclassified as employed after being classified as retired |                               |                                                                          | Retired for all visits after first meeting retirement definition |

MESA, Multi-Ethnic Study of Atherosclerosis

**Appendix Table 2.** Assignment of MET Values by Domain and Intensity of Physical Activity

| <b>Domain</b>                     | <b>Example activity</b>                               | <b>MET value</b> |
|-----------------------------------|-------------------------------------------------------|------------------|
| Non-walking leisure activities    | Dancing                                               | 5.0              |
|                                   | Team and dual sports                                  | 7.0              |
|                                   | Individual activities                                 | 3.5              |
|                                   | Conditioning activity (moderate effort)               | 5.5              |
|                                   | Conditioning activity (vigorous effort)               | 7.0              |
| Walking                           | Recreational walking (for exercise)                   | 3.5              |
|                                   | Transport walking (to get places)                     | 3.0              |
| Household/yard activities         | Cooking, dishes, shopping (light effort)              | 2.5              |
|                                   | Scrubbing, mopping, mowing, raking (moderate effort)  | 4.0              |
|                                   | Digging, shoveling snow (vigorous effort)             | 6.5              |
| Caregiving activities             | Bathing, feeding, changing diapers (light effort)     | 2.5              |
|                                   | Lifting, pushing wheelchair (moderate effort)         | 4.0              |
| Occupational/volunteer activities | Sitting (light effort)                                | 1.5              |
|                                   | Standing (light effort)                               | 2.5              |
|                                   | Lifting, pushing, sustained walking (moderate effort) | 3.0              |
|                                   | Manual labor, loading/unloading (vigorous effort)     | 7.0              |

**Appendix Table 3.** Definition of Chronic Conditions for Sensitivity Analyses Among Participants Healthy Throughout Follow-up<sup>a</sup> and With Chronic Conditions

| <b>Chronic condition</b>              | <b>Definition</b>                                                                                                                                                                        |
|---------------------------------------|------------------------------------------------------------------------------------------------------------------------------------------------------------------------------------------|
| Cardiovascular disease                | Coronary heart disease, angina, coronary artery revascularization, stroke, congestive heart failure, or peripheral vascular disease based physician review of abstracted medical records |
| Depression                            | Centers for Epidemiological Studies Depression Scale score $\geq 16$ at MESA exam 5                                                                                                      |
| Cognitive impairment                  | Cognitive Abilities Screening Instrument score $< 74$ at MESA exam 5 or ICD-9 codes from hospital records indicative of dementia                                                         |
| Cancer                                | Self-report of cancer other than non-melanoma skin cancer                                                                                                                                |
| Chronic obstructive pulmonary disease | ICD-9 codes from hospital records                                                                                                                                                        |

<sup>a</sup>Definition of good health adapted from Shea et al., *PLoS One*. 2016;11(11).

**Appendix**  
**Physical Activity, Sedentary Behavior, and Retirement: The Multi-Ethnic Study of Atherosclerosis**  
**Jones et al.**

**Appendix Figure 1.** Physical activity and TV watching by retirement status, overall sample.

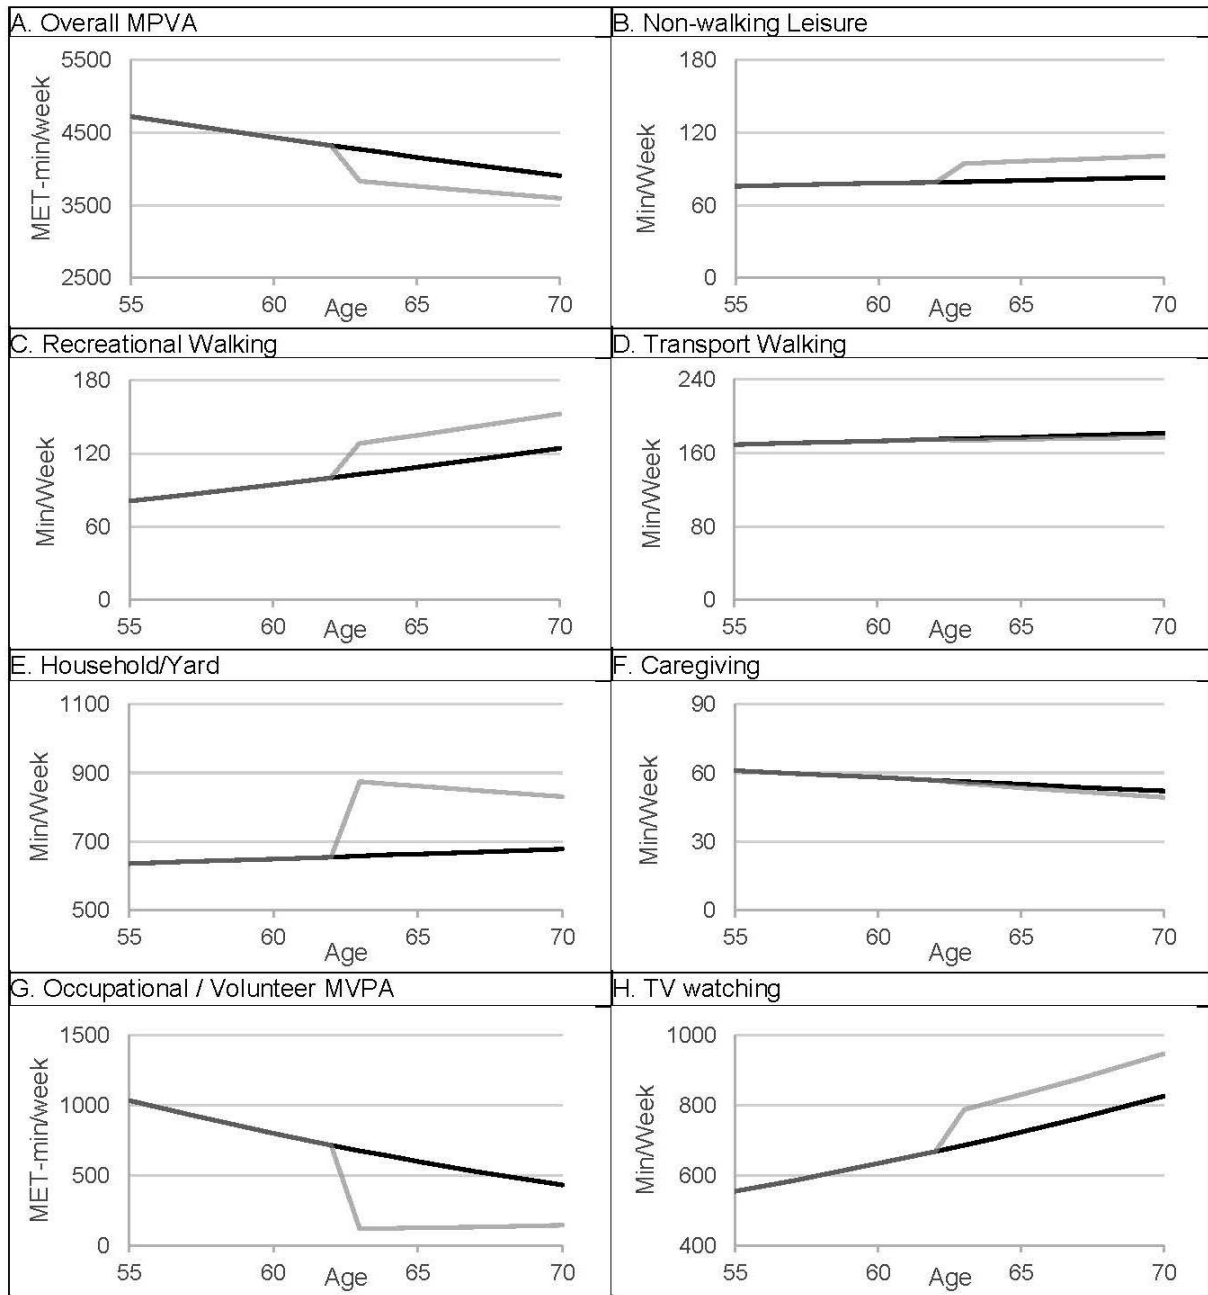

**Legend:** — Not retired — Retired at age 63

*Notes:* Estimated patterns of physical activity (overall and by domain) and TV watching by retirement status in the overall sample (N=4,091 MESA participants). Lines represent patterns for the average person who did not retire during follow-up (black line) and who retired at age 63 years (median retirement age in this cohort, grey line). Estimates back transformed from fixed-effect models of log-transformed outcomes adjusted for time-varying partnership status, self-reported health, and nine chronic conditions (asthma, emphysema, arthritis, high cholesterol, hypertension, diabetes, kidney disease, cancer, cardiovascular disease). Note scale of y-axis varies by domain. Data for these figures are presented in Table 2.

MVPA moderate-to-vigorous physical activity

**Appendix Figure 2.** Physical activity and TV watching by retirement status and socioeconomic position.

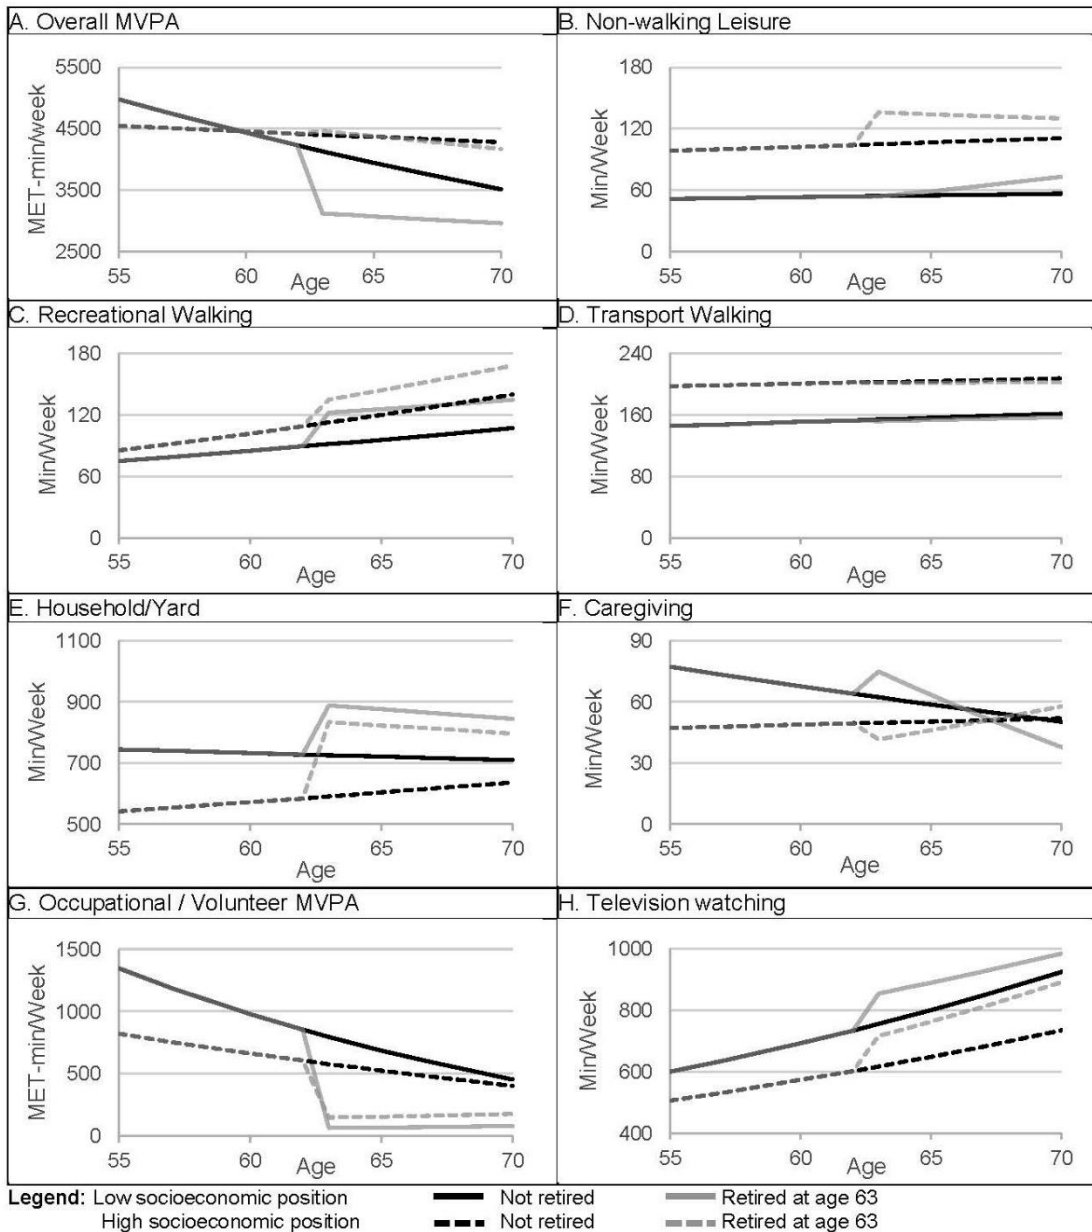

*Notes:* Estimated patterns of physical activity (overall and by domain) and TV watching by retirement status and socioeconomic position (SEP; N=2003 low SEP; N=2088 high SEP). Lines represent patterns for the average person who did not retire during follow-up (black line) and who retired at age 63 years (median retirement age in this cohort, grey line). Estimates back-transformed from fixed-effect models of log-transformed outcomes stratified by SEP and adjusted for time-varying partnership status, self-rated health, and nine chronic conditions (asthma, emphysema, arthritis, high cholesterol, hypertension, diabetes, kidney disease, cancer, cardiovascular disease). SEP was a composite index of education, income, and four indicators of wealth. Note scale of y-axis varies by domain. Data for these figures presented in Table 3.

MVPA, moderate-to-vigorous physical activity

**Appendix**  
**Physical Activity, Sedentary Behavior, and Retirement: The Multi-Ethnic Study of Atherosclerosis**  
**Jones et al.**

**Appendix Table 4.** Change<sup>a</sup> in Physical Activity and TV Watching by Retirement and SEP Among Participants With Chronic Conditions<sup>b</sup> (N=1,435)

| Behavior                     | Low SEP (N=811)                                              |                                          |                   | High SEP (N=624)                                             |                                          |                   |
|------------------------------|--------------------------------------------------------------|------------------------------------------|-------------------|--------------------------------------------------------------|------------------------------------------|-------------------|
|                              | Mean change associated with retirement <sup>c</sup> (95% CI) | Mean 5-year change <sup>d</sup> (95% CI) |                   | Mean change associated with retirement <sup>c</sup> (95% CI) | Mean 5-year change <sup>d</sup> (95% CI) |                   |
|                              |                                                              | Not retired                              | Retired           |                                                              | Not retired                              | Retired           |
| MVPA                         | 0.67 (0.58, 0.79)                                            | 0.90 (0.85, 0.95)                        | 1.01 (0.86, 1.19) | 0.94 (0.82, 1.07)                                            | 0.97 (0.92, 1.02)                        | 0.97 (0.84, 1.12) |
| Non-walking leisure          | 1.02 (0.91, 1.15)                                            | 1.04 (1.00, 1.08)                        | 1.12 (1.00, 1.27) | 1.24 (1.09, 1.40)                                            | 0.99 (0.95, 1.04)                        | 0.91 (0.79, 1.03) |
| Recreation walking           | 1.13 (0.98, 1.31)                                            | 1.04 (0.99, 1.09)                        | 1.09 (0.94, 1.27) | 1.03 (0.90, 1.18)                                            | 1.04 (0.99, 1.10)                        | 1.09 (0.94, 1.26) |
| Transport walking            | 0.95 (0.81, 1.11)                                            | 1.06 (1.01, 1.12)                        | 1.04 (0.88, 1.22) | 1.01 (0.85, 1.14)                                            | 1.02 (0.96, 1.07)                        | 1.01 (0.86, 1.18) |
| Household/yard activity      | 1.12 (0.97, 1.29)                                            | 0.97 (0.93, 1.02)                        | 1.03 (0.89, 1.20) | 1.18 (1.04, 1.34)                                            | 1.03 (0.98, 1.08)                        | 0.97 (0.85, 1.10) |
| Caregiving activity          | 0.94 (0.79, 1.13)                                            | 0.97 (0.92, 1.03)                        | 0.94 (0.79, 1.15) | 0.80 (0.68, 0.95)                                            | 0.97 (0.91, 1.03)                        | 1.27 (1.07, 1.51) |
| Occupational/ volunteer MVPA | 0.40 (0.34, 0.48)                                            | 0.80 (0.75, 0.85)                        | 0.93 (0.77, 1.12) | 0.57 (0.48, 0.67)                                            | 0.91 (0.86, 0.97)                        | 1.06 (0.89, 1.27) |
| TV watching                  | 1.10 (0.96, 1.28)                                            | 1.16 (1.10, 1.22)                        | 1.12 (0.97, 1.30) | 1.06 (0.93, 1.22)                                            | 1.18 (1.12, 1.24)                        | 1.34 (1.16, 1.55) |

<sup>a</sup>Values are exponentiated coefficients from linear models of log-transformed outcomes. Values can be interpreted as percentage differences, for example 1.07 represents a 7% increase in the outcome, conditional on adjustment variables (self-reported health, partnership status, and chronic conditions: asthma, emphysema, arthritis flare up, high cholesterol, hypertension, diabetes, kidney disease, cancer, cardiovascular disease).

<sup>b</sup>Restricted to participants with cardiovascular disease, depression, cognitive impairment, cancer, or chronic obstructive pulmonary disease during follow-up.

<sup>c</sup>Exponentiated mean difference in log-transformed outcome associated with retirement, conditional on adjustment variables.

<sup>d</sup>Exponentiated mean difference in log-transformed outcome associated with 5-year increase in age among retired and not retired participants, conditional on adjustment variables.

MVPA moderate to vigorous physical activity; SEP socioeconomic position
